# Supplementary material for: Construction of a hydrophobic–hydrophilic open-droplet microfluidic chemosensor towards colorimetric/spectrophotometric recognition of quetiapine fumarate: a cost-benefit method for biomedical analysis using a smartphone
Source: Royal Society of Chemistry journal article supplement (doi:10.1039/d3ay00801k), 2023-01-01
Supplement: d3ay00801k1.pdf [file d3ay00801k1.pdf]

## Supporting Information

### **Construction of hydrophobic-hydrophilic open-droplet microfluidic chemosensor towards colorimetric/spectrophotometric recognition of quetiapine fumarate: A cost-benefit method for biomedical analysis using smartphone**

Hossein Navay Baghban <sup>a</sup>, Kambiz Ghaseminasab <sup>b</sup>, Mohammad Hasanzadeh <sup>c,\*</sup>

<sup>a</sup> Nutrition Research Center, Tabriz University of Medical Sciences, Tabriz, Iran.

<sup>b</sup> Department of Biotechnology and Biomedicine, Technical University of Denmark, 2800 Kgs. Lyngby, Denmark.

<sup>c</sup> Pharmaceutical Analysis Research Center, Tabriz University of Medical Sciences, Tabriz, Iran.

#### **Corresponding authors**

\* (Mohammad Hasanzadeh), Pharmaceutical Analysis Research Center, Tabriz University of Medical Sciences, Tabriz 51664, Iran. Email: [hasanzadehm@tbzmed.ac.ir](mailto:hasanzadehm@tbzmed.ac.ir)

## Simple $\mu$ PCD designing

Each well's diameter= 5 mm

Central well diameter= 10 mm

Channel width= 3 mm

Channel length= 10 mm

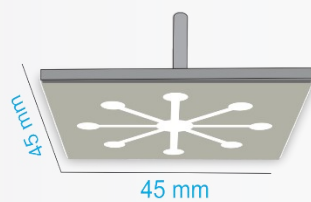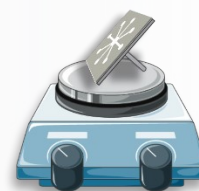

165 °C

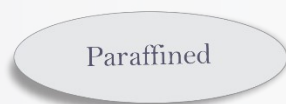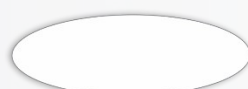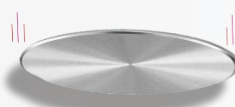

Magnet

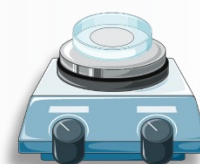

65 °C

**Scheme S1.** The fabrication procedure of  $\mu$ PCD.

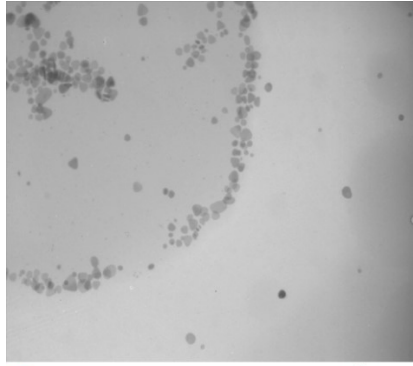

30 nm

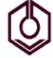

Drug Applied Research Center

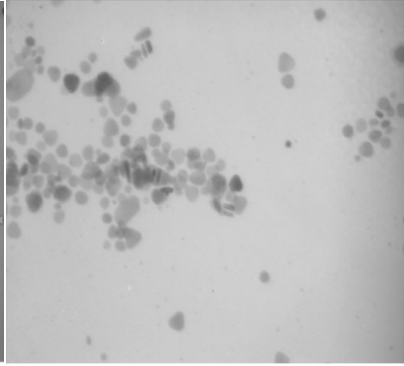

30 nm

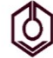

Drug Applied Research Center

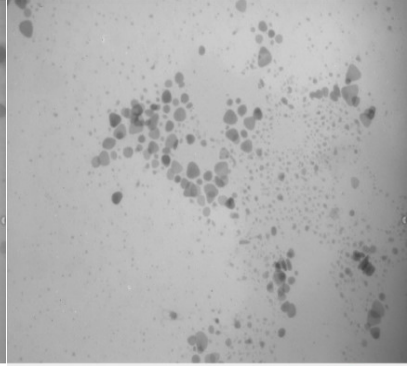

30 nm

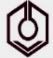

Drug Applied Research Center

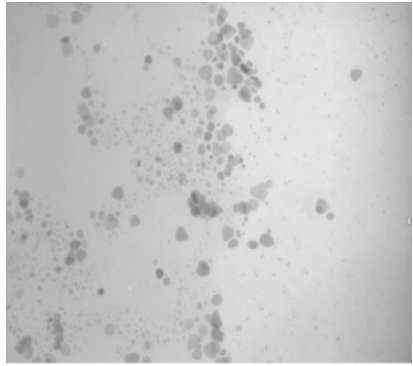

30 nm

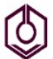

Drug Applied Research Center

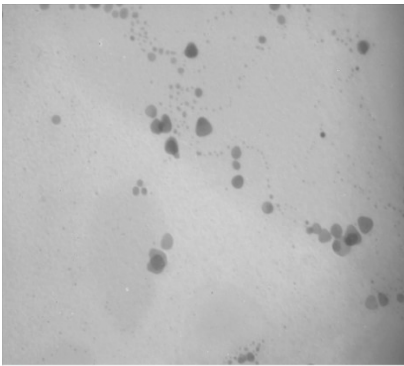

20 nm

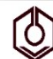

Drug Applied Research Center

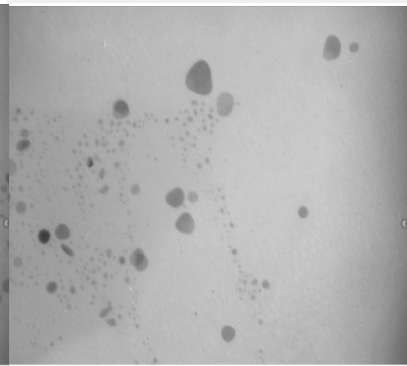

20 nm

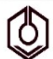

Drug Applied Research Center

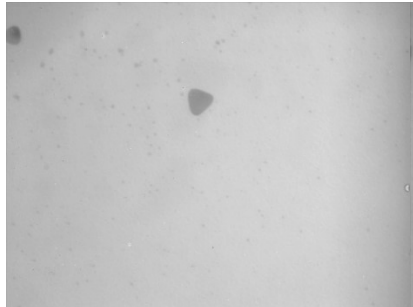

30 nm

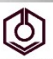

Drug Applied Research Center

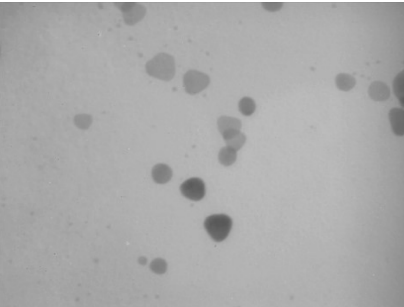

20 nm

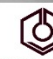

Drug Applied Research Center

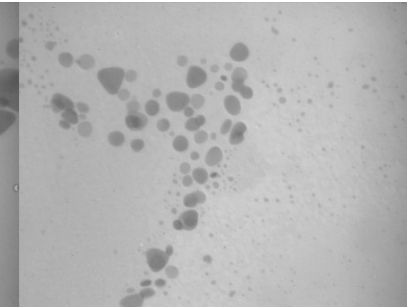

15 nm

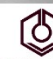

Drug Applied Research Center

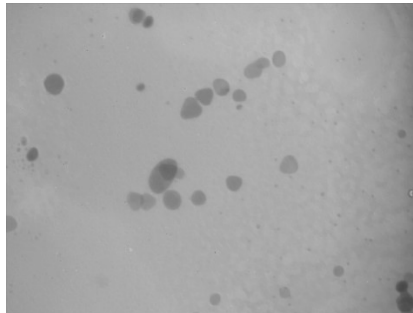

15 nm

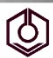

Drug Applied Research Center

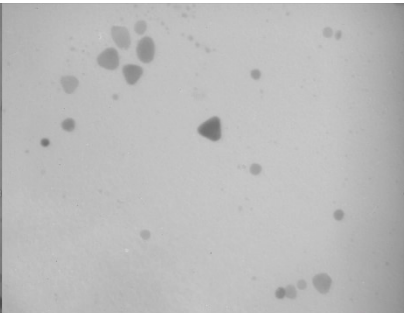

15 nm

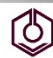

Drug Applied Research Center

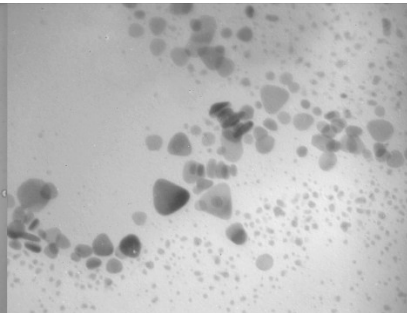

15 nm

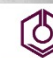

Drug Applied Research Center

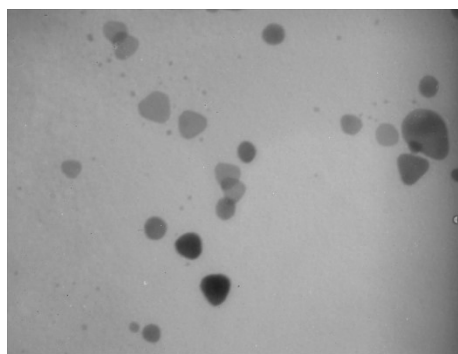

10 nm

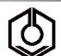

Drexel Applied Research Center

**Fig. S1.** TEM images of Ag NPrs in 30, 20, 15, and 10 nm scales

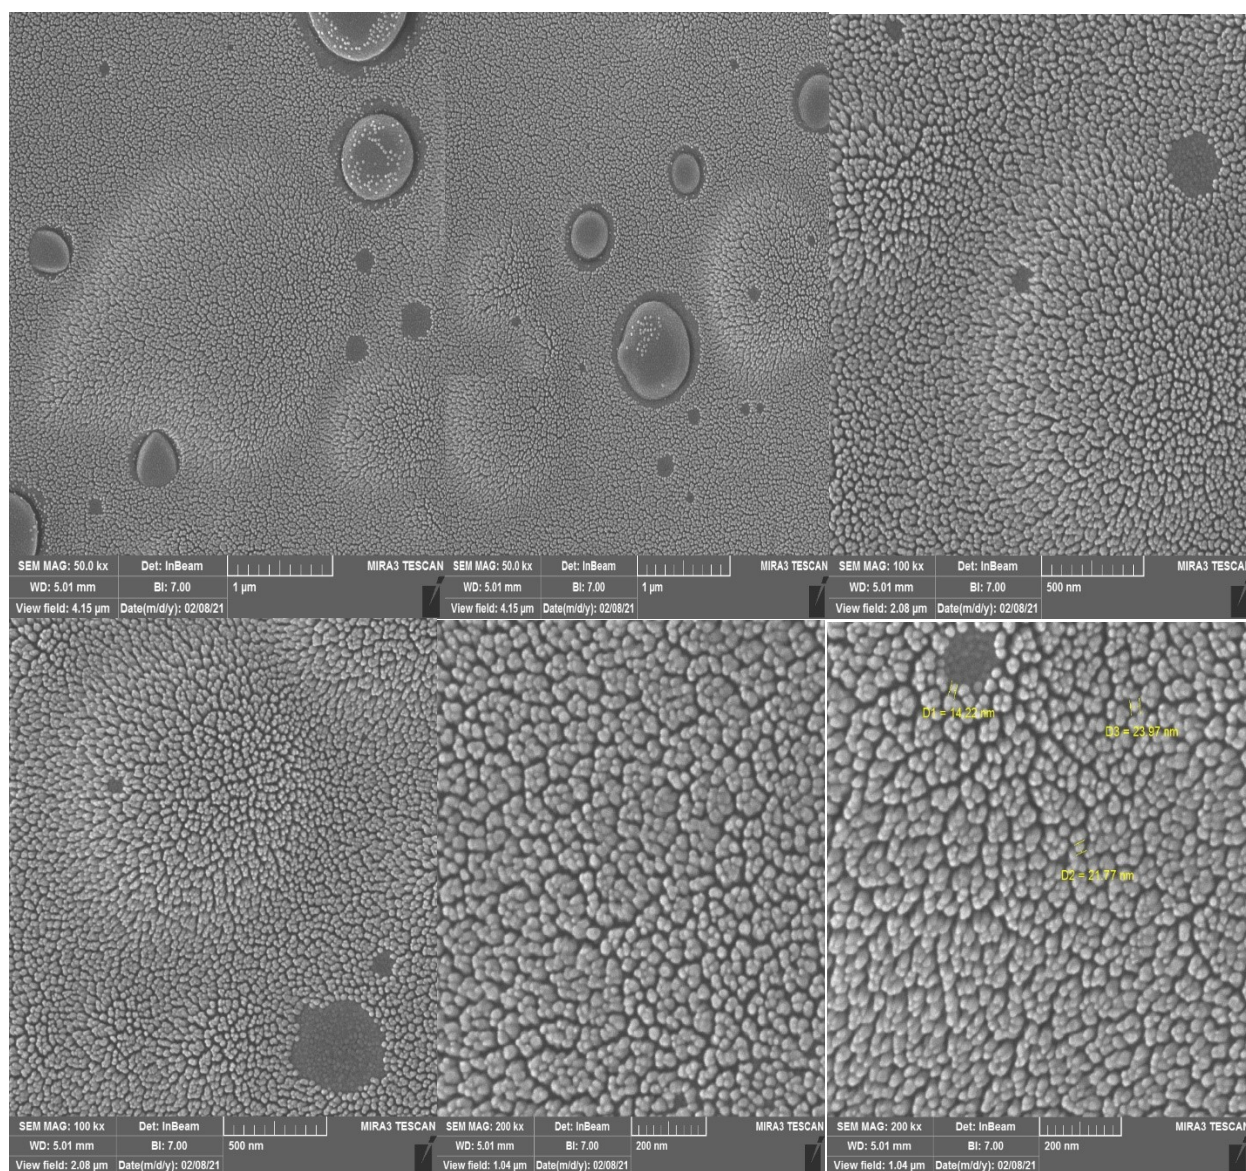



**Fig. S2.** FE-SEM Images of AgNPrs in different magnification.

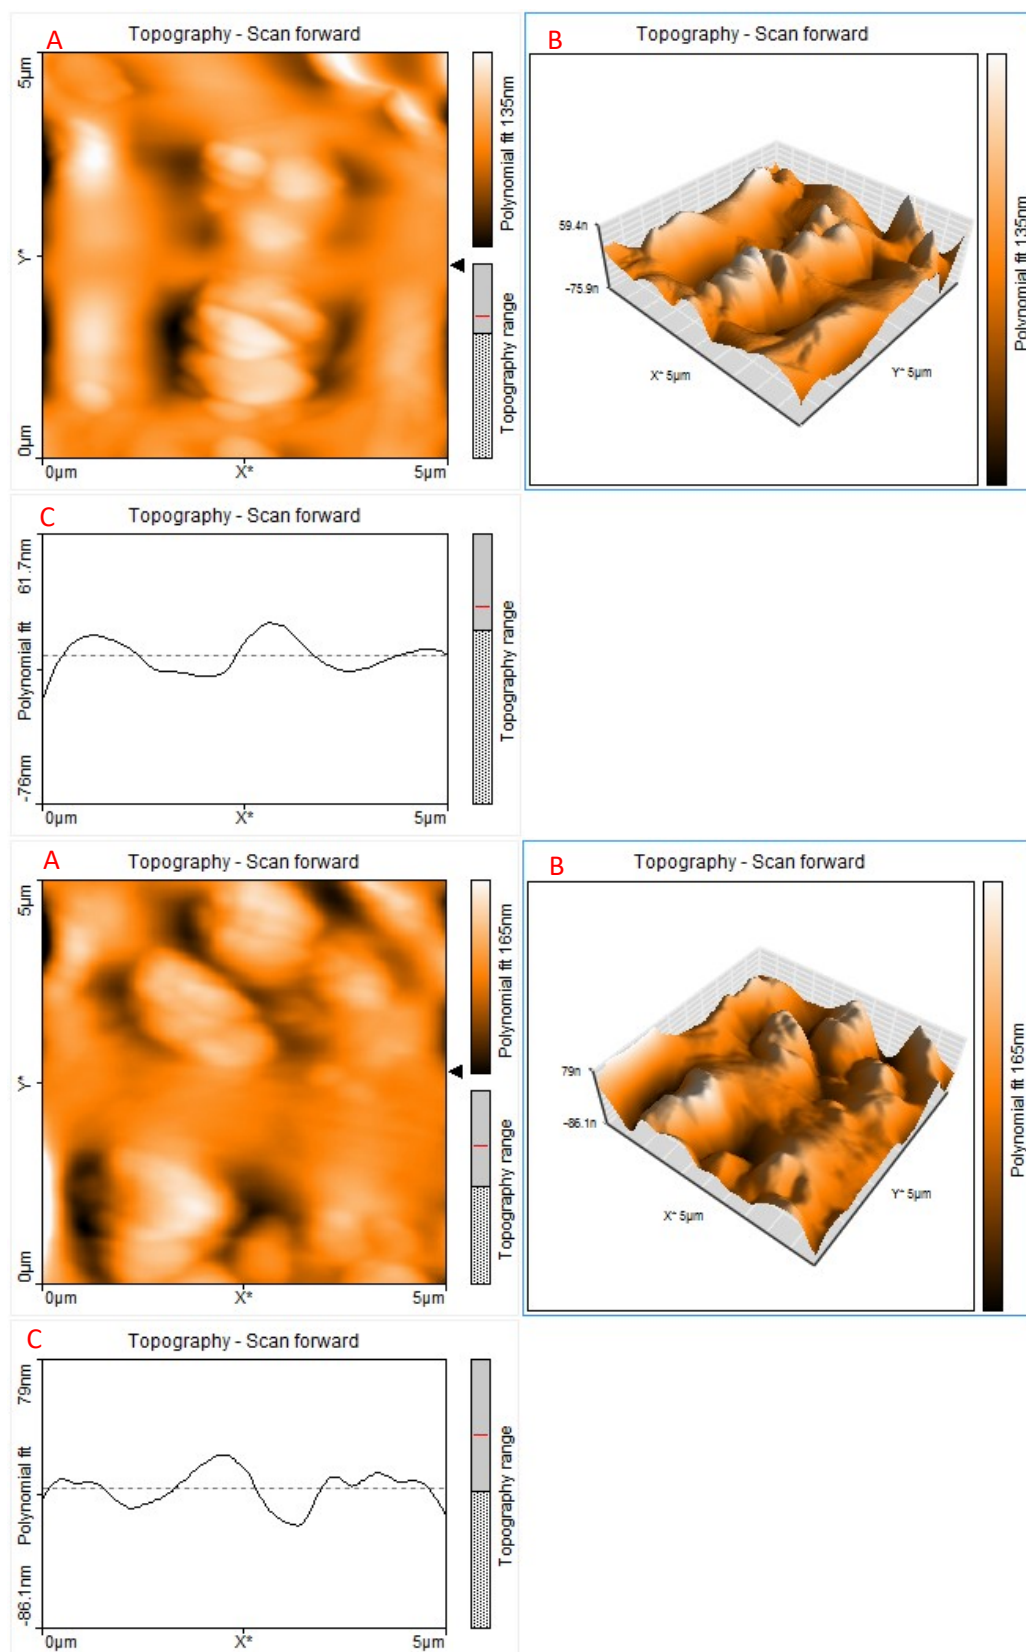

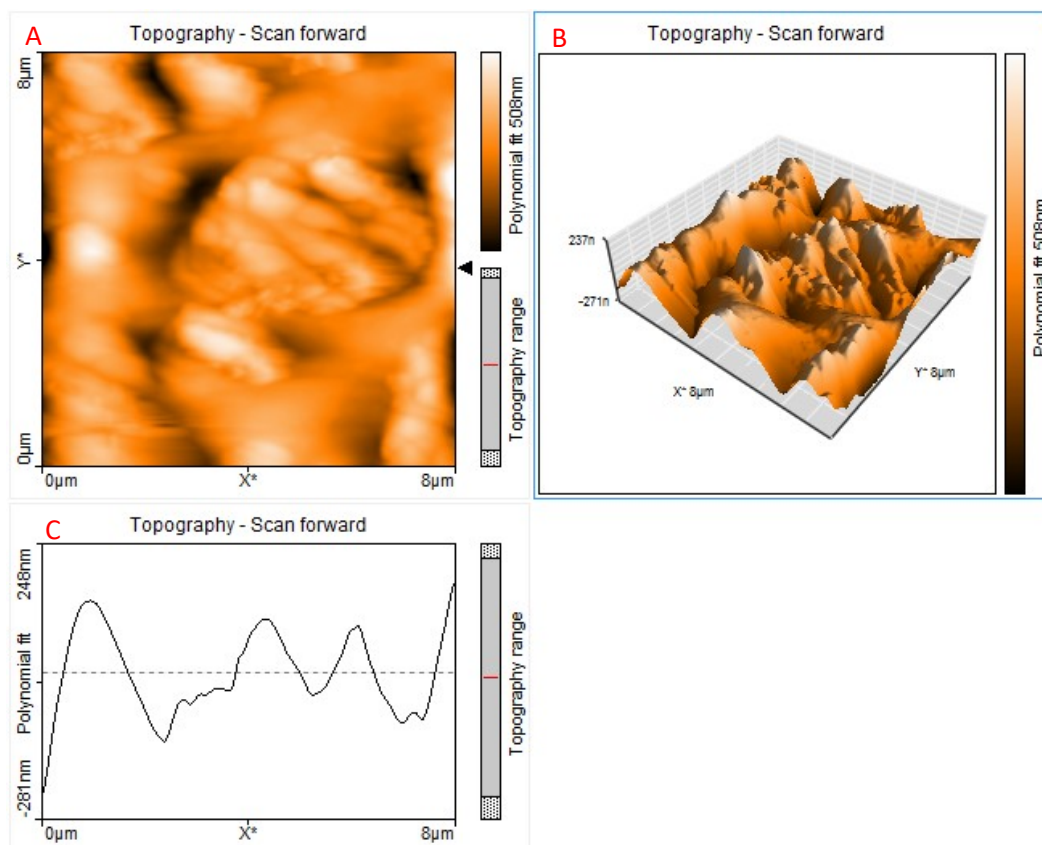

**Fig. S3.** 2D (A) and 3D (B) of topographic AFM images of AgNPs

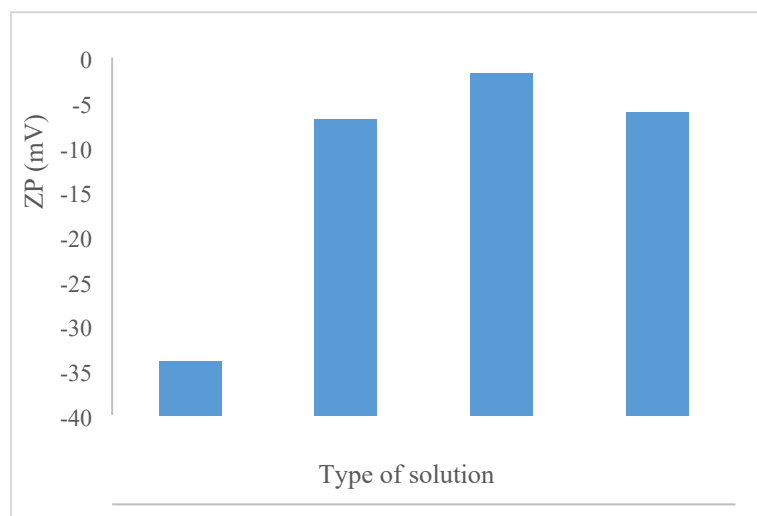

**Fig. S4.** Comparison between Zp of probs.

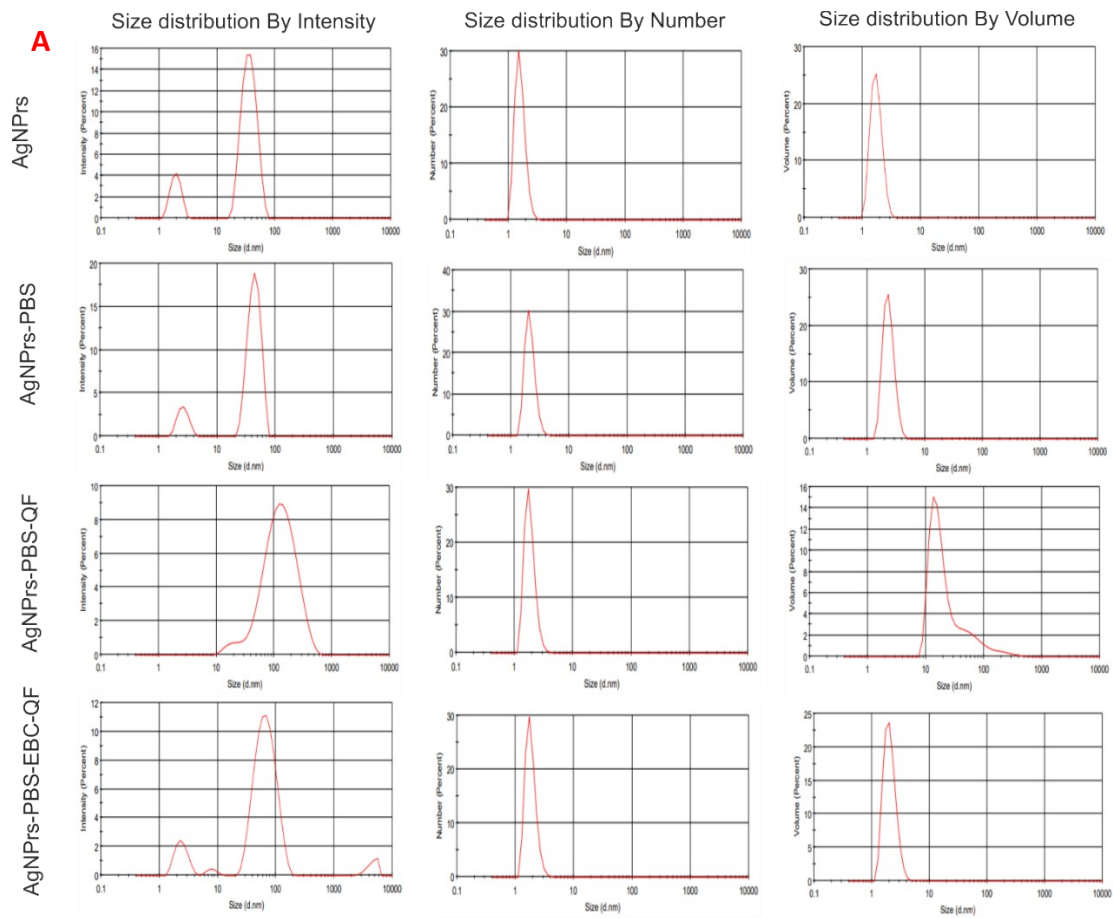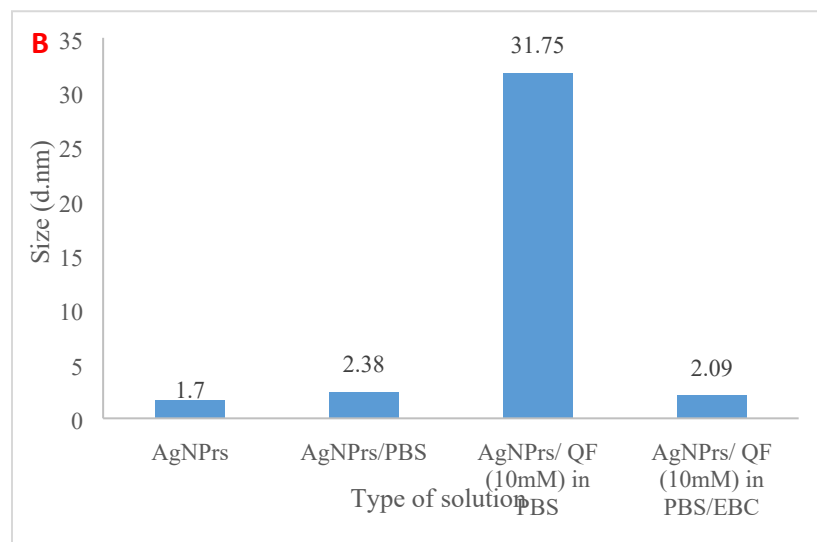

**Fig. S5. A)** DLS graphs of AgNPrs and affected AgNPrs by intensity, number, and volume. **B)** Comparison between DLS of probes.

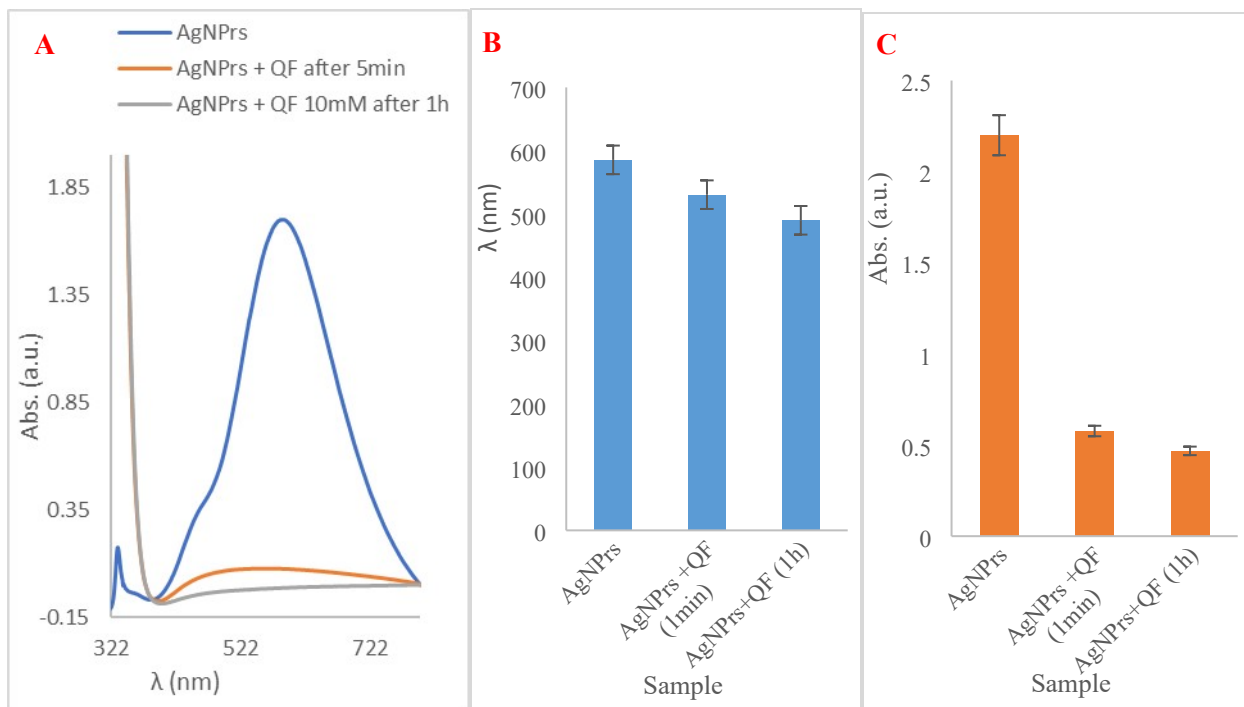

**Fig S6. A)** Spectrophotometric analysis of AgNPrs, AgNPrs+ QF after 5 min, AgNPrs+ QF after 1h **B)** The histogram of related wavelength **C)** The histogram of related light absorption intensity ( $\lambda_{490-585.5}$ ).

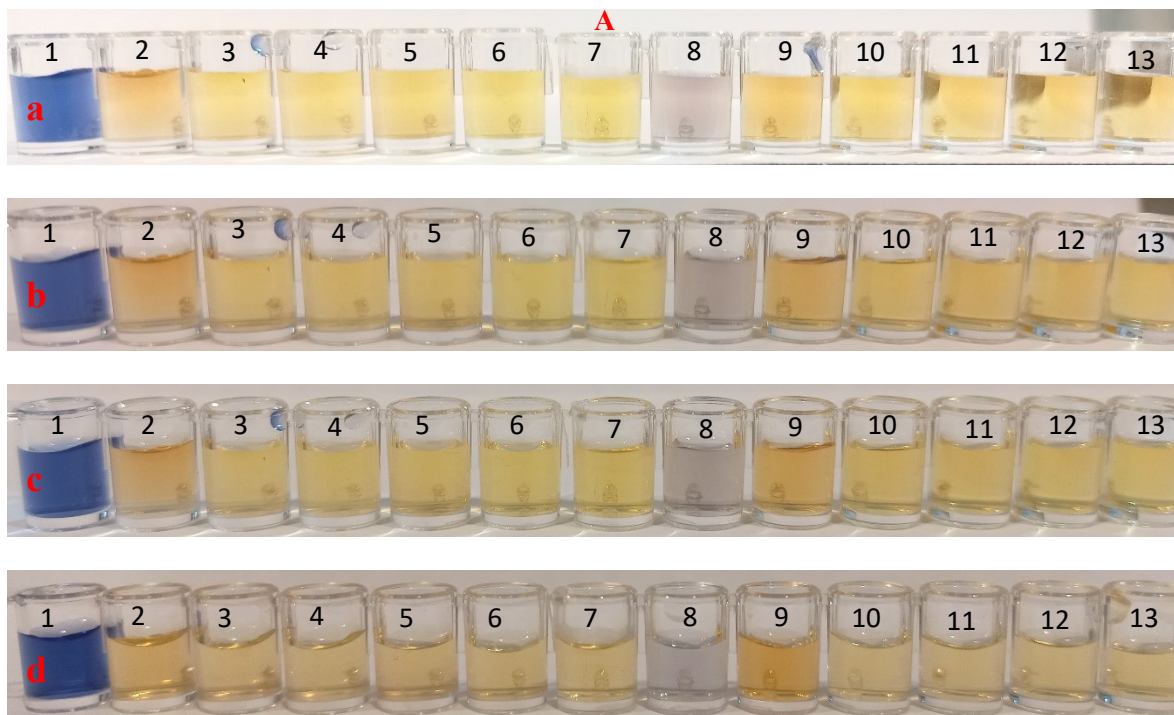



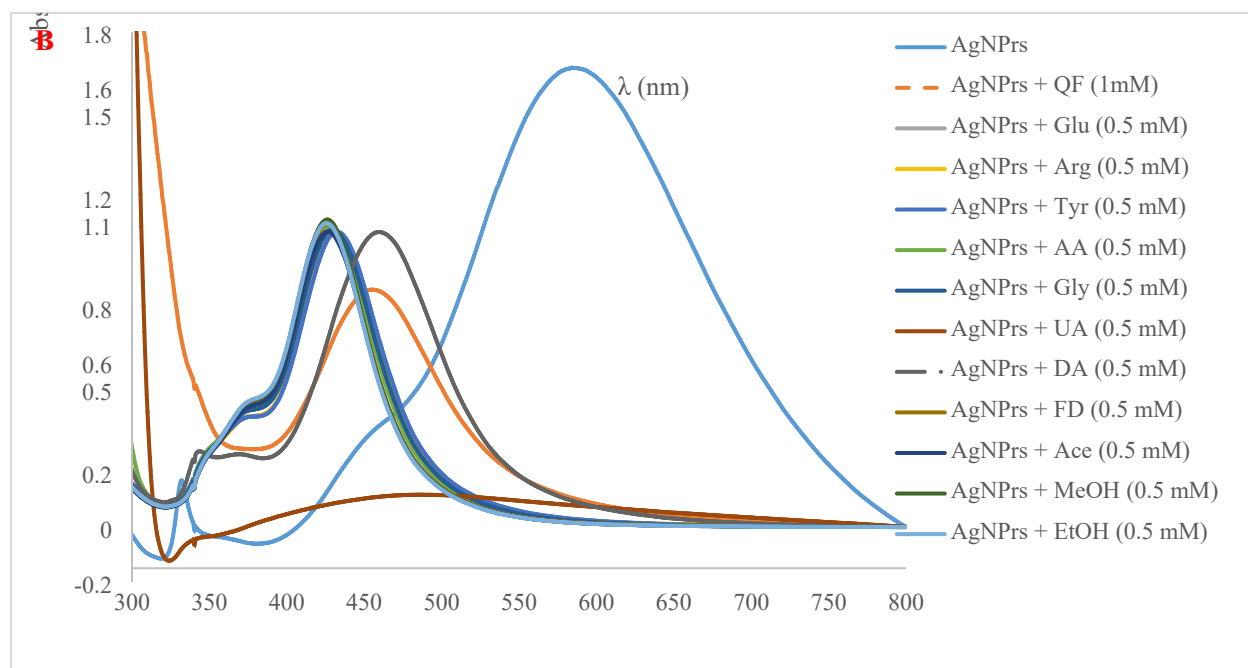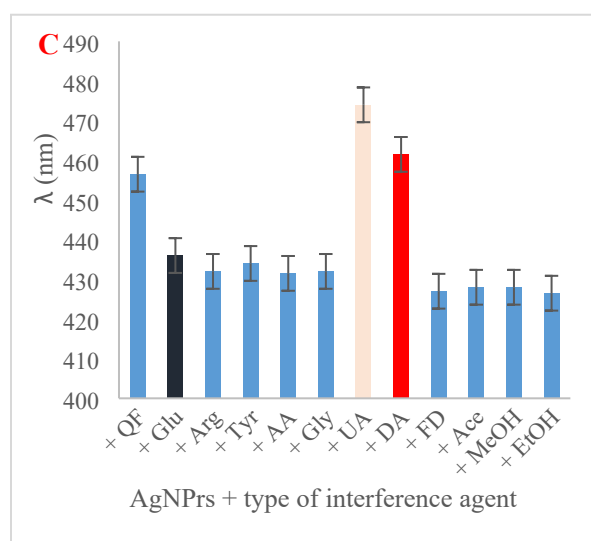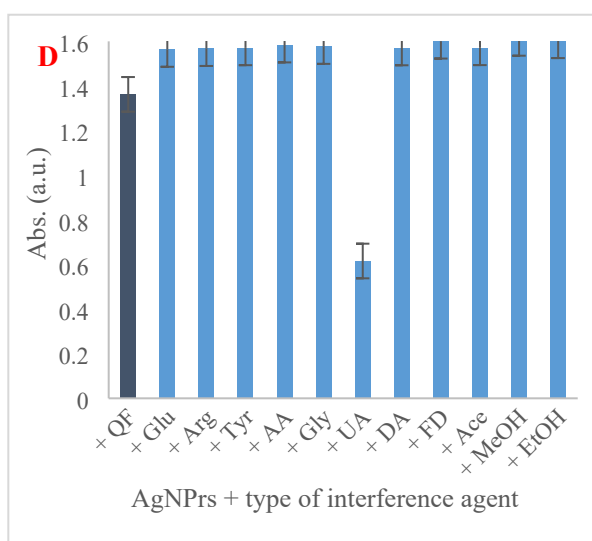

**Fig S7. A)** Digital images of **1.** AgNPrs, **2.** AgNPrs/QF, **3.** AgNPrs/Glu, **4.** AgNPrs /Arg, **5.** AgNPrs /Tyr, **6.** AgNPrs/AA, **7.**AgNPrs/ Gly, **8.** AgNPrs/UA, **9.** AgNPrs/DA, **10.** AgNPrs/FD, **11.** AgNPrs/Ace, **12.** AgNPrs/MeOH, and **13.** AgNPrs/EtOH at **a)** 10 seconds, **b)** 1 minute, **c)** 3 minutes, and **d)** 1 hour after the reaction. The ratio of solutions from No. 2 to No. 13 is 1:1 V/V (AgNPrs/QF (1 mM) or interference species (0.5 mM)). **B)** Uv-vis Spectrophotometric of related solutions with the ratio of 1:1 V/V. **C)** The LSPR peak position histogram of mentioned solutions ( $\lambda=426-474$  nm). **D)** The LSPR peak intensity histogram of mentioned solutions ( $\lambda=426-474$  nm).

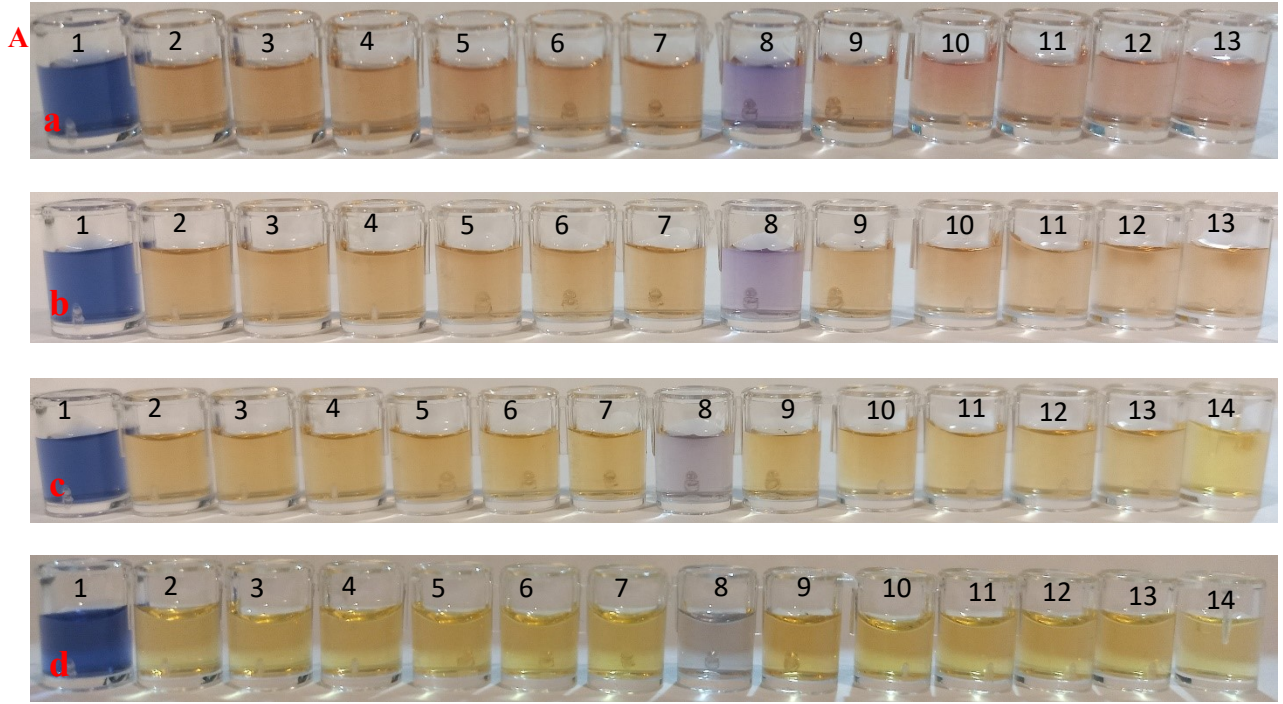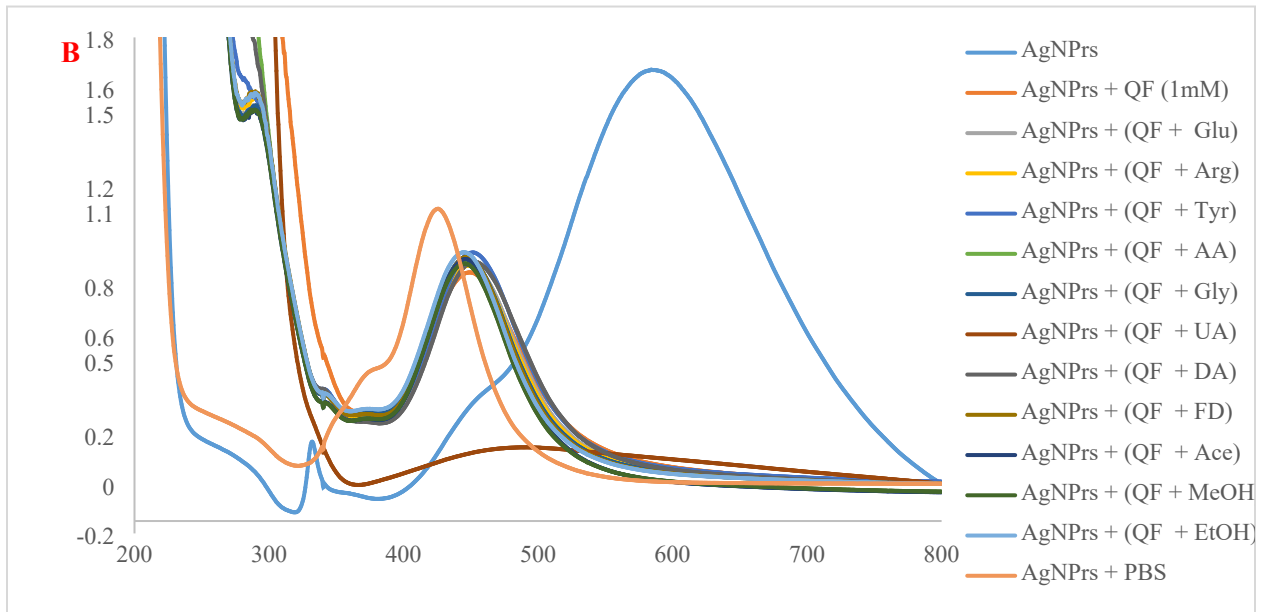

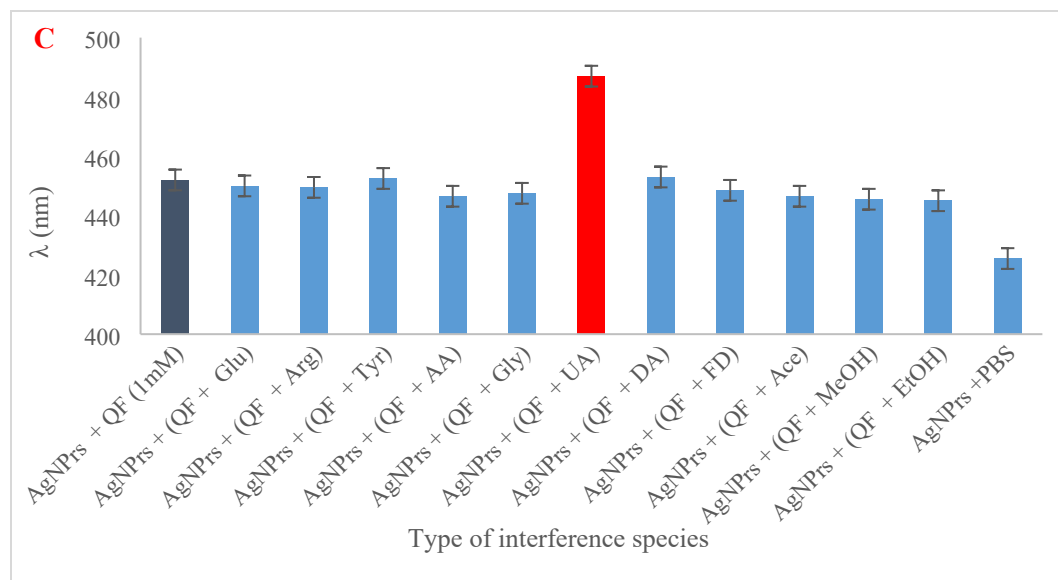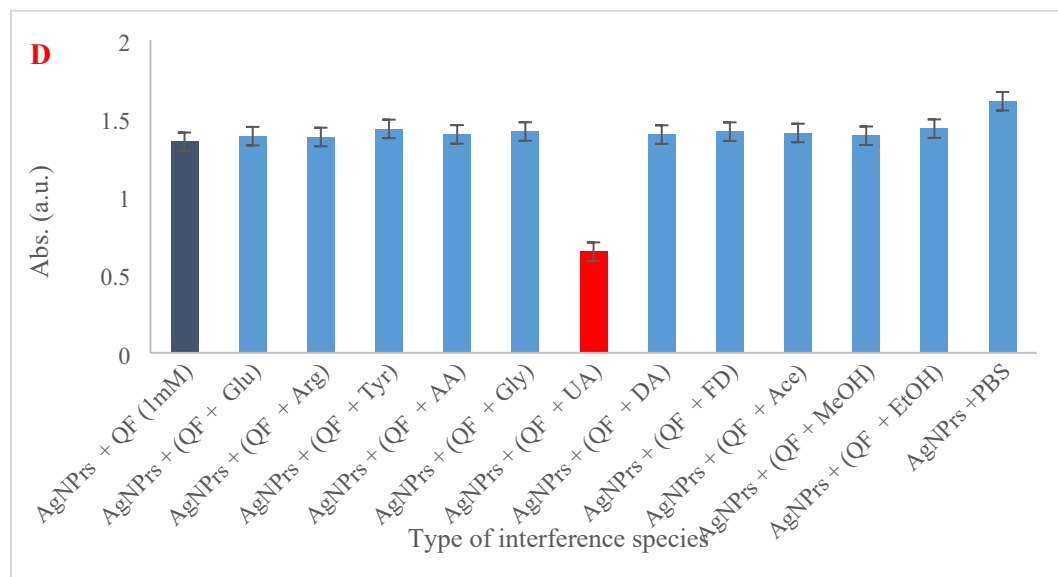

**Fig S8.** **A)** Digital images of **1.** AgNPrs, **2.** AgNPrs/QF (1:1 V/V), **3.** AgNPrs/QF/Glu, **4.** AgNPrs/QF/Arg, **5.** AgNPrs/QF/Tyr, **6.** AgNPrs/QF/AA, **7.** AgNPrs/QF/Gly, **8.** AgNPrs/QF/UA, **9.** AgNPrs/QF/DA, **10.** AgNPrs/QF/FD, **11.** AgNPrs/QF/Ace, **12.** AgNPrs/QF/MeOH, **13.** AgNPrs/QF/EtOH at **a)** 10 seconds, **b)** 1 minute, **c)** 5 minutes, and **d)** 1 hour after the reaction. The ratio of solutions from No. 3 to No. 13 is 1:0.5:0.5 V/V/V (AgNPrs/QF (1 mM)/interference species (0.5 mM)). No. 14 (AgNPrs/PBS with 1:1 V/V ratio) was added in c and d for comparison. **B)** Uv-vis Spectrophotometric of related solutions. **C)** The LSPR peak position histogram of

mentioned solutions ( $\lambda=425-487$  nm). D) The LSPR peak intensity histogram of mentioned solutions ( $\lambda=425-487$  nm).

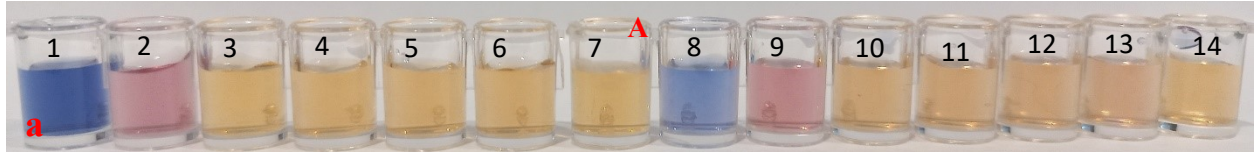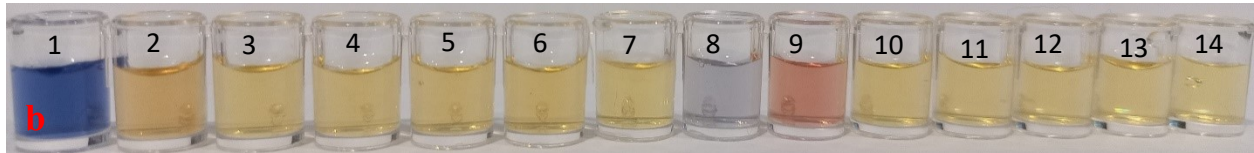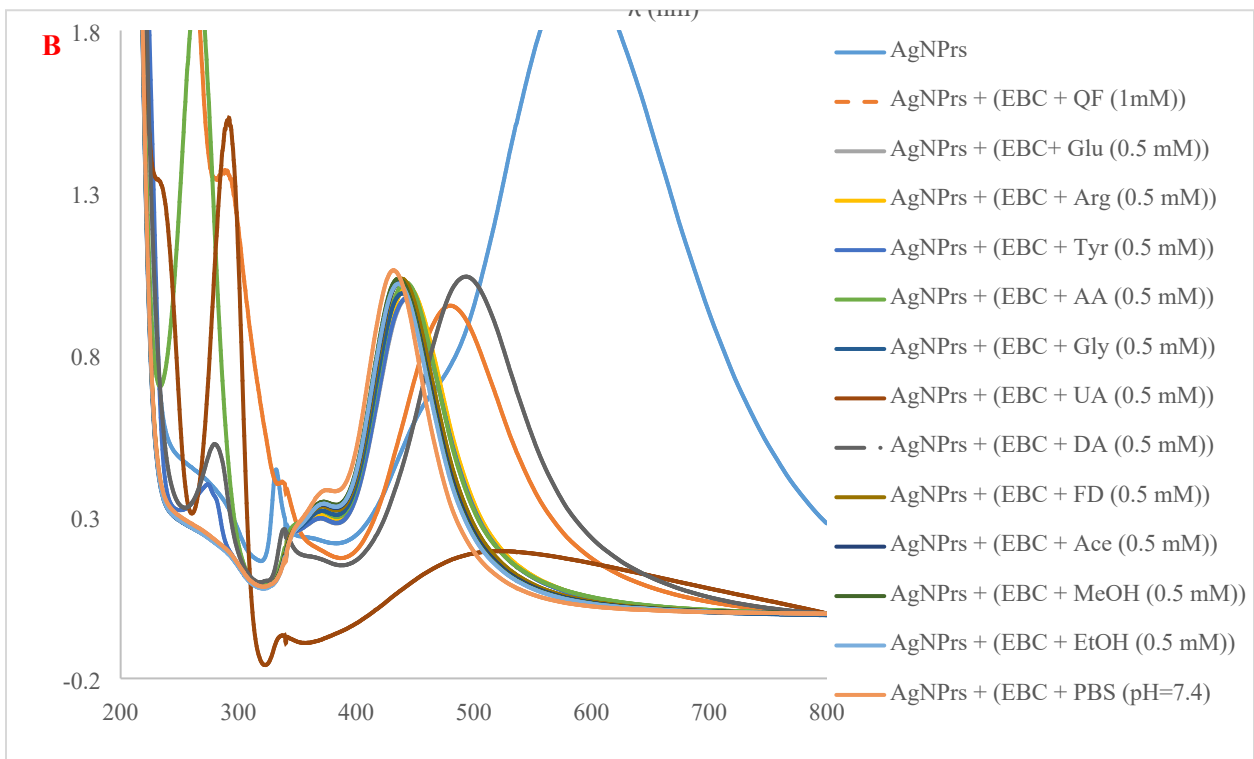



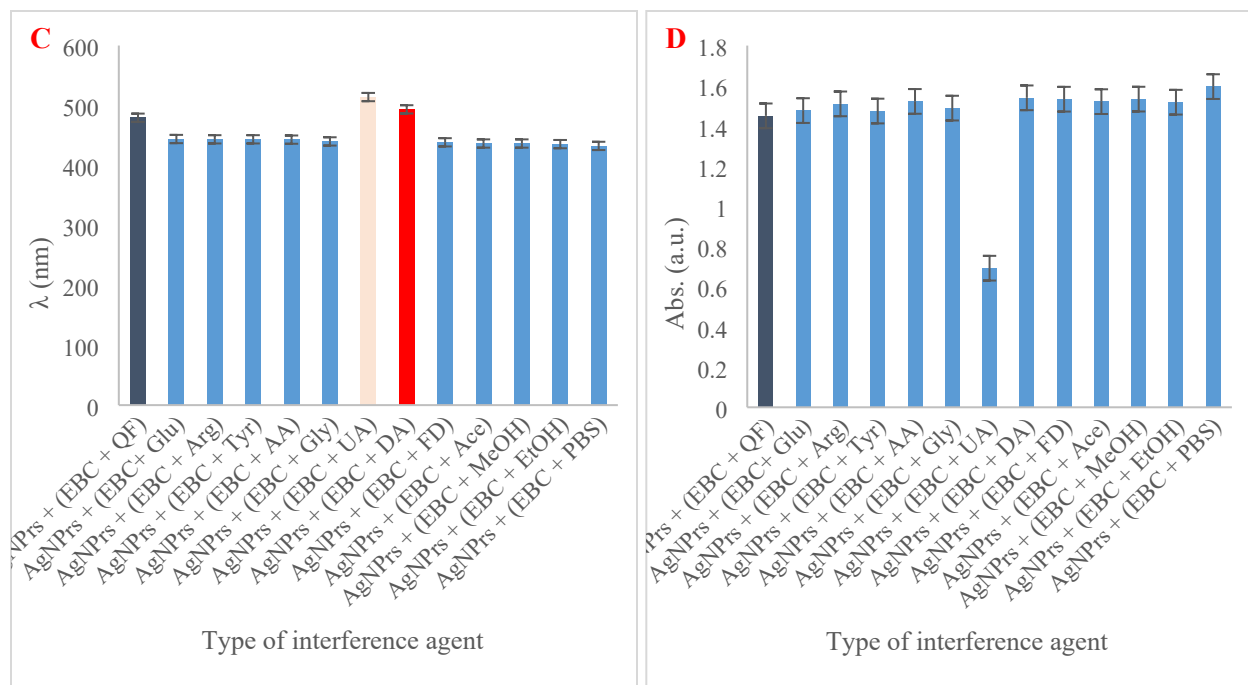

**Fig S9. A)** Digital images of **1.** AgNPs, **2.** AgNPs/EBC/QF, **3.** AgNPs/EBC/Glu, **4.** AgNPs/EBC/ Arg, **5.** AgNPs/EBC/Tyr, **6.** AgNPs/EBC/AA, **7.** AgNPs/EBC/Gly, **8.** AgNPs/EBC/UA, **9.** AgNPs/EBC/DA, **10.** AgNPs/EBC/FD, **11.** AgNPs/EBC/Ace, **12.** AgNPs/EBC/MeOH, **13.** AgNPs/EBC/EtOH, and **14.** AgNPs/EBC/PBS at **a)** 10 seconds, **b)** 45 minutes after the reaction. The ratio of solutions from No. 2 to 13 is 1:0.5:0.5 V/V/V (AgNPs/EBC/QF (1mM) or interference species (0.5 mM) and for No. 14 is 1:0.5:0.5 V/V/V (AgNPs/EBC/PBS). **B)** The related Uv-Vis spectrophotometric for mentioned solutions. **C)** The LSPR peak position histogram of mentioned solutions. **D)** The LSPR peak intensity histogram of mentioned solutions.

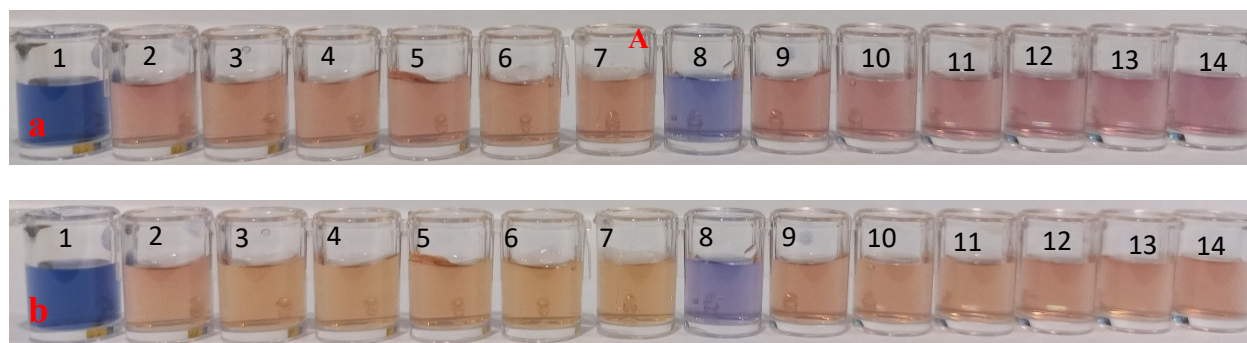

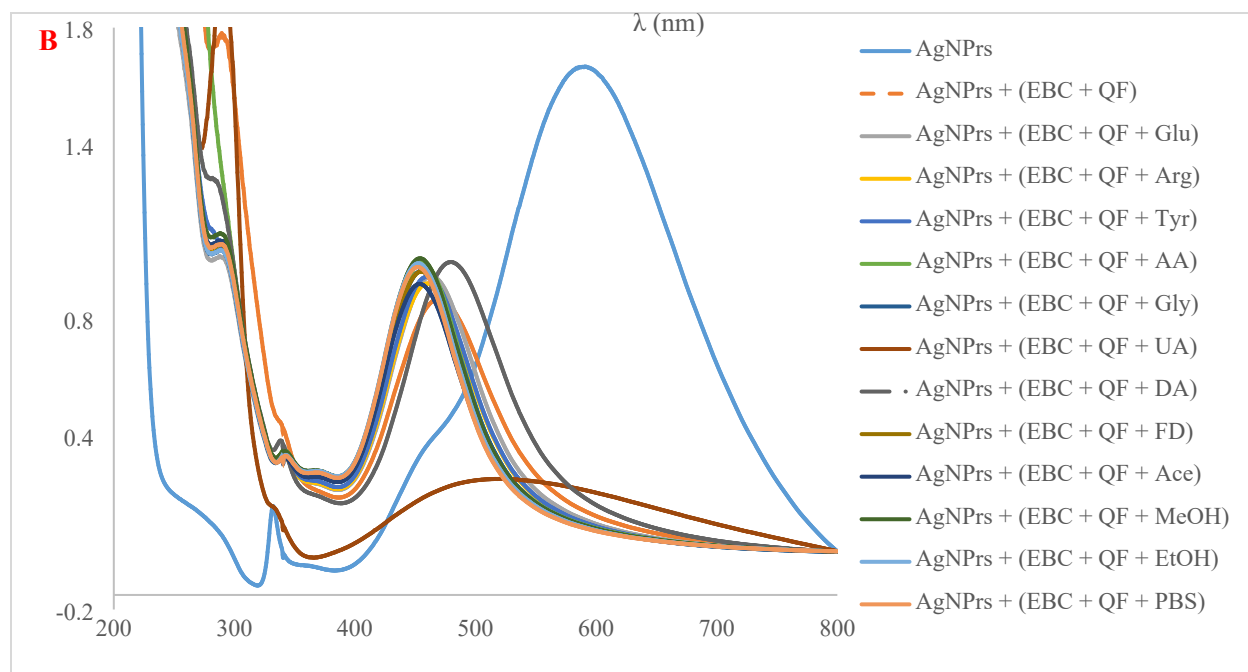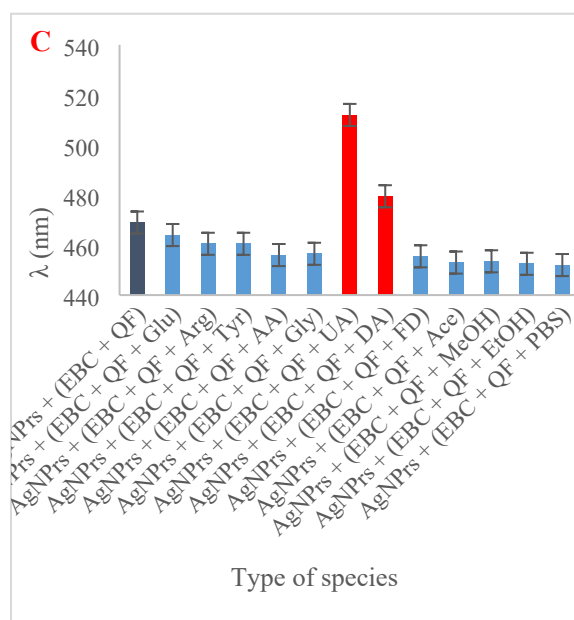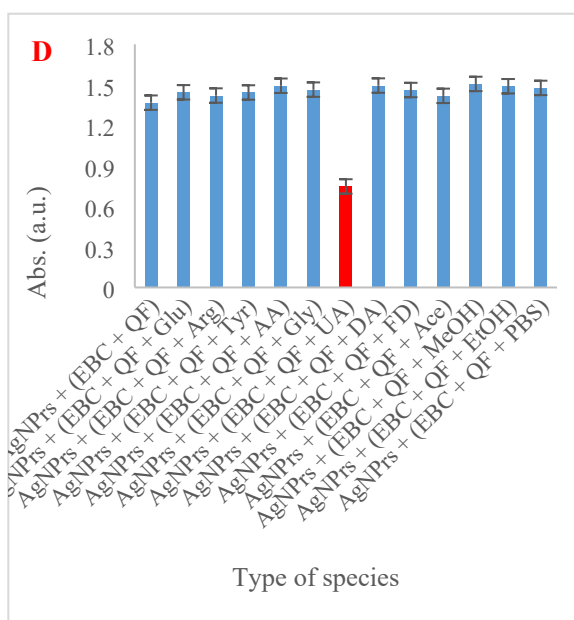

**Fig S10.** A) Digital images of 1. AgNPrs, 2. AgNPrs/EBC/QF (1.5:0.5:1 V/V/V), 3. AgNPrs/EBC/QF/Glu, 4. AgNPrs/EBC/QF/Arg, 5. AgNPrs/EBC/QF/Tyr, 6. AgNPrs/EBC/QF/AA, 7. AgNPrs/EBC/QF/Gly, 8. AgNPrs/EBC/QF/UA, 9. AgNPrs/EBC/QF/DA, 10. AgNPrs/EBC/QF/FD, 11. AgNPrs/EBC/QF/Ace, 12. AgNPrs/EBC/QF/MeOH, 13. AgNPrs/EBC/QF/EtOH, and 14. AgNPrs/EBC/QF/PBS (1.5:0.5:0.5:0.5 V/V/V/V) at A) 10

seconds, **B**) 1 minute after the reaction. The ratio of solutions from No. 3 to No. 13 is 1.5:0.5:0.5:0.5 V/V/V/V (AgNPrs/EBC/QF (1 mM) /interfering species (0.5 mM)). **B**) The related uv-vis spectrophotometric for mentioned solutions. **C**) The LSPR peak position histogram of mentioned solutions. **D**) The LSPR peak intensity histogram of mentioned solutions.

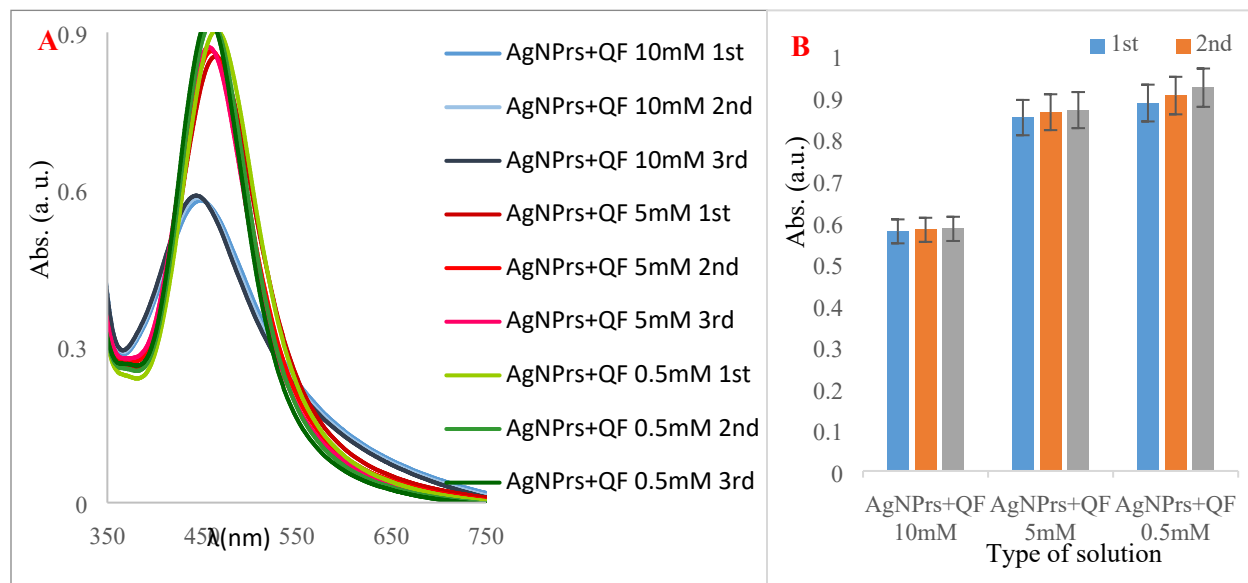

**Fig S11. A)** The Uv-Vis spectrum of three separate combinations of AgNPrs with QF 10 (n=3), 5 (n=3), 0.5 (n=3) mM included in PBS with 1:1 V/V ratio.

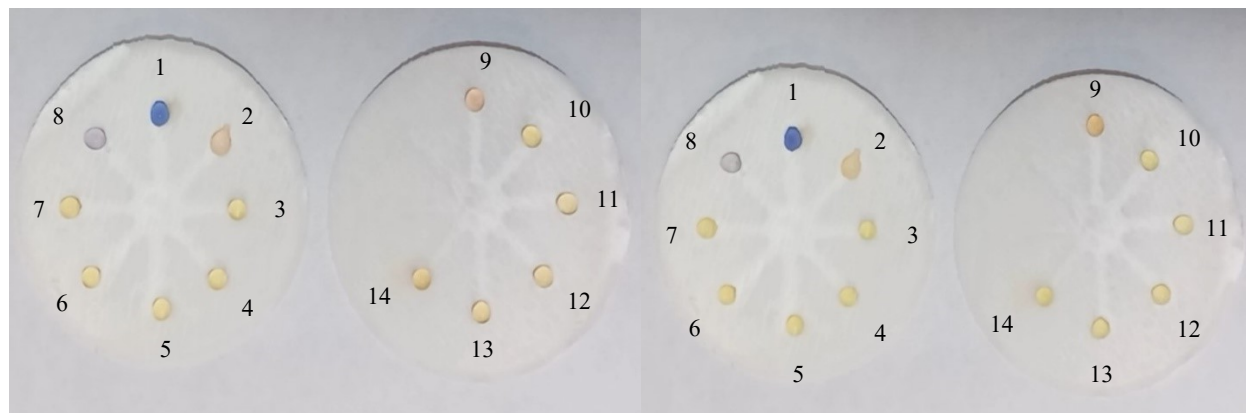

▶ 06:41 / 28:23

▶ 28:13 / 28:23

**Fig S12.** Digital images of  $\mu$ PCD sheets with semi-hydrophilic wells injected with: 1. AgNPrs, 2. AgNPrs/QF, 3. AgNPrs/Glu, 4. AgNPrs /Arg, 5. AgNPrs /Tyr, 6. AgNPrs/AA, 7. AgNPrs/ Gly, 8.

AgNPrs/UA, **9.** AgNPrs/DA, **10.** AgNPrs/FD, **11.** AgNPrs/Ace, **12.** AgNPrs/MeOH, and **13.** AgNPrs/EtOH, and **14.** AgNPrs/PBS. The ratio of solutions from No. 2 to No. 14 is 1:1 V/V (AgNPrs/QF (1 mM) or interference species (0.5 mM) or PBS.

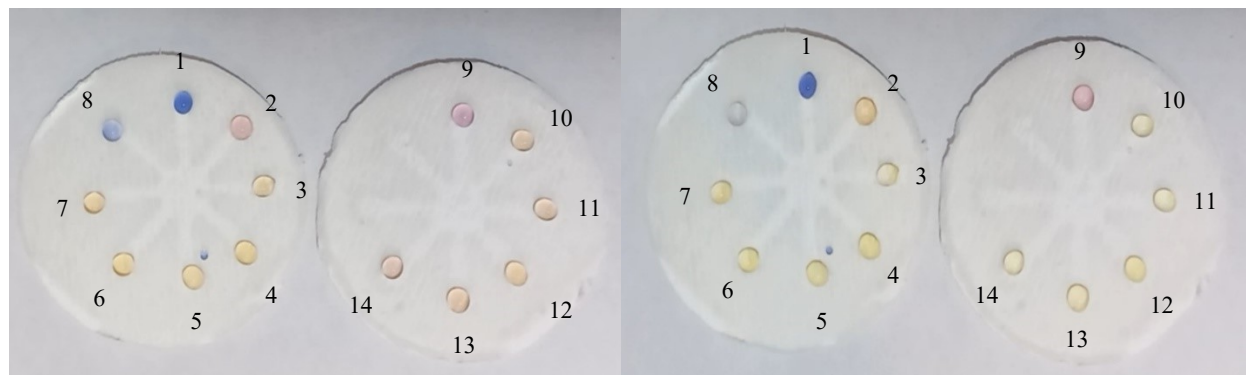

07:16 / 21:04

21:03 / 21:04

**Fig S13.** Digital images of  $\mu$ PCD sheets with semi-hydrophilic wells injected with: **1.** AgNPrs, **2.** AgNPrs/EBC/QF, **3.** AgNPrs/EBC/Glu, **4.** AgNPrs /EBC/ Arg, **5.** AgNPrs/EBC/Tyr, **6.** AgNPrs/EBC/AA, **7.** AgNPrs/EBC/Gly, **8.** AgNPrs/EBC/UA, **9.** AgNPrs/EBC/DA, **10.** AgNPrs/EBC/FD, **11.** AgNPrs/EBC/Ace, **12.** AgNPrs/EBC/MeOH, **13.** AgNPrs/EBC/EtOH, and **14.** AgNPrs/EBC/PBS. The ratio of solutions from No. 2 to 14 is 1:0.5:0.5 V/V/V (AgNPrs/EBC/QF (1 mM) or interference species (0.5 mM) or PBS.



**Table S1.** The assigned RGB codes and names for the colorimetric tests.

| fig               | item | RGB code      | ~ color name       | fig     | item          | RGB code         | ~ color name | fig          | item            | RGB code          | ~ color name    |             |
|-------------------|------|---------------|--------------------|---------|---------------|------------------|--------------|--------------|-----------------|-------------------|-----------------|-------------|
| 1. A              | 1    | 44, 64, 125   | Marian Blue        | 4. A. b | 5             | 180, 131, 89     | Light Taupe  | 4. A. d      | 13              | 160, 141, 85      | Dark Tan        |             |
|                   | 2    | 154, 150, 151 | Spanish Gray       |         | 6             | 183, 141, 77     | Aztec Gold   |              | 14              | 160, 145, 77      |                 |             |
| 1. B              | 1    | 42, 64, 136   | Marian Blue        |         | 7             | 181, 144, 79     |              | 5. A. a      | 1               | 34, 49, 113       | Delft blue      |             |
|                   | 2    | 184, 184, 184 | Medium Gray        |         | 8             | 175, 144, 73     |              |              | 2               | 146, 99, 125      | Antique Fuchsia |             |
| 1. C              | 1    | 26, 46, 133   | Air Force Blue     |         | 9             | 190, 155, 80     |              | 5. A. b      | 3               | 89, 102, 152      | Queen Blue      |             |
|                   | 2    | 189, 190, 193 | Medium Gray        |         | 10            | 185, 147, 79     |              |              | 1               | 63, 80, 149       | Marian Blue     |             |
| 1. D              | 1    | 33, 50, 121   | Air Force Blue     |         | 11            | 194, 150, 90     |              | 5. A. c      | 2               | 193, 139, 145     | Rosy Brown      |             |
|                   | 2    | 175, 175, 175 | Dark Gray          |         | 12            | 181, 139, 72     |              |              | 3               | 140, 134, 179     | Blue Bell       |             |
| 3.A. 5<br>Seconds | 1    | 42, 62, 144   | Marian Blue        |         | 13            | 197, 158, 80     |              | 5. A. d      | 1               | 35, 48, 109       | Delft blue      |             |
|                   | 2    | 177, 178, 184 | Dark Gray          |         | 14            | 194, 163, 90     |              |              | 2               | 160, 109, 100     | Dark Chestnut   |             |
|                   | 3    | 205, 171, 119 | Light French Beige |         | 1             | 48, 67, 126      |              |              | Marian Blue     | 3                 | 106, 96, 137    | Purple Navy |
|                   | 4    | 200, 179, 171 | Silver Pink        |         | 2             | 160, 130, 96     |              |              | Pale Brown      | 1                 | 32, 48, 112     | Purple Navy |
|                   | 5    | 161, 160, 169 | Quick Silver       |         | 3             | 141, 112, 81     |              |              |                 | 2                 | 171, 119, 93    | Pecan Brown |
| 3.A. 15<br>min    | 1    | 34, 44, 135   | Cosmic Cobalt      |         | 4             | 146, 116, 81     |              | 4. A. c      | 3               | 121, 97, 134      | French Lilac    |             |
|                   | 2    | 172, 171, 180 | Dark Gray          | 5       | 169, 133, 61  | Dark Goldenrod   |              |              | 1               | 37, 59, 116       | Delft blue      |             |
|                   | 3    | 193, 164, 117 | Light French Beige | 6       | 173, 144, 67  | Aztec Gold       | 2            |              | 127, 85, 94     | Deep Taupe        |                 |             |
|                   | 4    | 179, 164, 164 | Silver Pink        | 7       | 164, 139, 68  | Dark Tan         | 3            |              | 89, 85, 123     | Purple Navy       |                 |             |
|                   | 5    | 166, 161, 162 | Quick Silver       | 8       | 170, 145, 61  | Brass            | 4            |              | 113, 83, 114    | French Lilac      |                 |             |
| 4. A. a           | 1    | 64, 90, 167   | Medium Sapphire    | 9       | 170, 141, 52  | Dark Goldenrod   | 5            |              | 108, 79, 116    | Old Heliotrope    |                 |             |
|                   | 2    | 183, 144, 179 | Glossy Grape       | 10      | 171, 139, 56  |                  | 6            |              | 114, 80, 107    | Eggplant          |                 |             |
|                   | 3    | 198, 141, 148 | Puce               | 11      | 177, 143, 73  | Aztec Gold       | 7            |              | 121, 81, 96     | Raspberry Glace   |                 |             |
|                   | 4    | 192, 140, 142 | Rosy Brown         | 12      | 177, 139, 52  | Dark Goldenrod   | 8            |              | 122, 83, 97     | Deep Taupe        |                 |             |
|                   | 5    | 223, 167, 123 | Tumbleweed         | 13      | 180, 148, 52  | Satin Sheen Gold | 9            |              | 126, 84, 94     |                   |                 |             |
|                   | 6    | 228, 187, 108 | Maximum Yellow Red | 14      | 178, 145, 55  | Dark Goldenrod   | 10           |              | 126, 86, 97     | Twilight Lavender |                 |             |
|                   | 7    | 222, 186, 108 | Meat brown         | 1       | 51, 55, 120   | Dark Slate Blue  | 11           |              | 121, 83, 108    |                   |                 |             |
|                   | 8    | 226, 192, 100 | Golden Ochre       | 2       | 155, 134, 113 | Almond Frost     | 12           |              | 122, 87, 113    |                   |                 |             |
|                   | 9    | 225, 192, 107 |                    | 3       | 151, 125, 97  | Pale Brown       | 13           |              | 122, 86, 115    |                   | Antique Fuchsia |             |
|                   | 10   | 229, 186, 118 | Pale Gold          | 4       | 142, 123, 92  | Shadow           | 14           | 122, 89, 119 | Delft blue      |                   |                 |             |
|                   | 11   | 228, 187, 119 |                    | 5       | 161, 139, 78  | Dark Tan         | 1            | 36, 58, 115  |                 |                   |                 |             |
|                   | 12   | 228, 187, 109 | Maximum Yellow Red | 6       | 155, 136, 75  |                  | 6            | 131, 88, 98  | Raspberry Glace |                   |                 |             |
|                   | 13   | 234, 195, 113 | Topaz              | 7       | 155, 144, 73  | Old Moss Green   | 3            | 90, 86, 124  | Purple Navy     |                   |                 |             |
|                   | 14   | 231, 195, 108 | Golden Ochre       | 8       | 155, 143, 77  | Dark Tan         | 4            | 113, 82, 113 | French Lilac    |                   |                 |             |
| 4. A. b           | 1    | 46, 64, 123   | Marian Blue        | 9       | 165, 149, 71  | Brass            | 5            | 112, 84, 118 | Old Lavender    |                   |                 |             |
|                   | 2    | 169, 122, 122 | Burnished Brown    | 10      | 160, 141, 74  | Dark Tan         | 6            | 118, 86, 106 |                 |                   |                 |             |
|                   | 3    | 161, 118, 97  | Tawny Birch        | 11      | 166, 142, 78  |                  | 7            | 126, 88, 96  | Deep Taupe      |                   |                 |             |
|                   | 4    | 154, 115, 101 | Blast-Off Bronze   | 12      | 156, 135, 72  |                  | 8            | 127, 87, 96  |                 |                   |                 |             |



| fig     | item | RGB code      | ~ color name       | fig           | item               | RGB code         | ~ color name       | fig                | item               | RGB code           | ~ color name     |               |               |
|---------|------|---------------|--------------------|---------------|--------------------|------------------|--------------------|--------------------|--------------------|--------------------|------------------|---------------|---------------|
| 8. A. b | 1    | 62, 80, 128   | Purple Navy        | 8. A. d       | 11                 | 166, 136, 78     | Dark Tan           | 10. A. a           | 7                  | 168, 126, 104      | Tawny Birch      |               |               |
|         | 2    | 187, 149, 104 | Camel              |               | 12                 | 168, 136, 75     |                    |                    | Rhythm             |                    |                  |               |               |
|         | 3    | 190, 152, 105 |                    |               | 13                 | 171, 141, 81     | Aztec Gold         |                    | 9                  | 166, 118, 106      | Blast-Off Bronze |               |               |
|         | 4    | 190, 155, 110 |                    |               | 14                 | 172, 149, 97     |                    |                    | 10                 | 163, 114, 110      | Copper Penny     |               |               |
|         | 5    | 187, 149, 104 |                    | 1             | 67, 88, 145        | Medium Sapphire  | 11                 |                    | 164, 116, 114      | Burnished Brown    |                  |               |               |
|         | 6    | 189, 152, 103 |                    | 2             | 181, 132, 137      | Rosy Brown       | 12                 |                    | 159, 112, 115      | Copper rose        |                  |               |               |
|         | 7    | 190, 157, 112 | 3                  | 206, 167, 108 | Light French Beige | 13               | 160, 114, 117      |                    | Turkish Rose       |                    |                  |               |               |
|         | 8    | 155, 141, 158 | Rose quartz        | 4             | 204, 165, 110      | Camel            | 14                 |                    | 158, 112, 122      | Marian Blue        |                  |               |               |
|         | 9    | 193, 160, 122 | Camel              | 5             | 201, 162, 107      |                  | Light French Beige |                    | 1                  | 53, 73, 124        | Light Taupe      |               |               |
|         | 10   | 192, 158, 121 |                    | 6             | 200, 161, 107      | Wild Blue Yonder | 2                  |                    | 181, 135, 109      |                    |                  |               |               |
|         | 11   | 197, 167, 130 | Light French Beige | 7             | 202, 166, 111      | Rosy Brown       | 3                  |                    | 180, 137, 102      |                    |                  |               |               |
|         | 12   | 202, 172, 138 | Tan                | 8             | 110, 129, 171      | Camel            | 4                  |                    | 180, 137, 104      |                    |                  |               |               |
|         | 13   | 198, 168, 134 | Hazelnut           | 9             | 186, 136, 139      |                  | Pale Taupe         |                    | 5                  | 180, 137, 103      |                  |               |               |
| -       | -    | -             | 10                 | 198, 160, 118 | Light French Beige | 6                | 179, 139, 102      |                    |                    |                    |                  |               |               |
| 8. A. c | 1    | 60, 74, 119   | Purple Navy        | 11            | 199, 157, 115      | 9. A. a          | 10. A. b           | 7                  | 178, 139, 101      | Rhythm             |                  |               |               |
|         | 2    | 186, 149, 97  | Camel              | 12            | 200, 158, 118      |                  |                    | French Beige       |                    |                    |                  |               |               |
|         | 3    | 187, 152, 96  | Aztec Gold         | 13            | 198, 157, 125      |                  |                    | Light Taupe        | 8                  | 121, 114, 147      |                  |               |               |
|         | 4    | 186, 153, 100 | Camel              | 14            | 207, 170, 122      |                  |                    |                    | Light French Beige | 9                  |                  | 173, 128, 103 |               |
|         | 5    | 185, 149, 94  |                    | 1             | 50, 72, 122        |                  |                    | Marian Blue        | 10                 | 176, 132, 107      |                  |               |               |
|         | 6    | 187, 154, 91  | Aztec Gold         | 2             | 182, 146, 96       |                  |                    | Camel              | 11                 | 179, 135, 110      |                  |               |               |
|         | 7    | 188, 159, 101 |                    | 3             | 185, 162, 108      |                  |                    | Light French Beige | 12                 | 176, 128, 108      |                  |               |               |
|         | 8    | 157, 145, 147 | Taupe Gray         | 4             | 184, 160, 106      |                  |                    |                    | Light Taupe        | 13                 |                  | 182, 133, 116 |               |
|         | 9    | 188, 159, 103 | Aztec Gold         | 5             | 185, 160, 104      |                  |                    | 9. A. b            |                    | 14                 | 182, 135, 120    | Tawny Birch   |               |
|         | 10   | 190, 159, 103 |                    | 6             | 183, 158, 100      |                  |                    |                    | Aztec Gold         | 1                  | 106, 123, 174    | Glauous       |               |
|         | 11   | 191, 164, 109 | Light French Beige | 7             | 185, 167, 115      |                  |                    |                    | Sand               | 2                  | 203, 184, 170    | Coffee Foam   |               |
|         | 12   | 193, 166, 113 |                    | 8             | 150, 145, 151      |                  |                    |                    | Taupe Gray         | 3                  | 182, 164, 176    | Rose quartz   |               |
|         | 13   | 196, 173, 123 |                    | 9             | 171, 116, 99       |                  |                    |                    | Blast-Off Bronze   | 4                  | 206, 181, 185    | Silver Pink   |               |
|         | 14   | 208, 190, 124 |                    | Sand          | 10                 |                  |                    |                    | 188, 165, 113      | Light French Beige | 5                |               | 203, 175, 174 |
| 8. A. d | 1    | 43, 57, 94    |                    | Delft blue    | 11                 | 187, 165, 115    | 10. A. b           |                    | 12. 4 min          |                    | 6                | 215, 180, 184 | Pale Chestnut |
|         | 2    | 165, 134, 81  |                    | Dark Tan      | 12                 | 190, 168, 119    |                    |                    |                    | 7                  | 210, 181, 175    | Silver Pink   |               |
|         | 3    | 164, 133, 76  |                    |               | 13                 | 191, 169, 119    |                    |                    |                    | Sand               | 8                | 180, 154, 163 | Lilac Luster  |
|         | 4    | 162, 132, 71  |                    |               | 14                 | 191, 173, 128    |                    |                    |                    |                    | 1                | 106, 122, 172 | Glauous       |
|         | 5    | 162, 131, 69  |                    |               | 1                  | 49, 67, 115      |                    |                    |                    | Marian Blue        | 2                | 204, 190, 177 | Pale Silver   |
|         | 6    | 158, 132, 71  |                    |               | 10. A. a           | 2                |                    |                    |                    | 166, 119, 105      | Tawny Birch      | 3             | 197, 176, 173 |
|         | 7    | 160, 136, 77  |                    | 3             |                    | 168, 120, 98     |                    |                    |                    | 4                  |                  | 208, 183, 179 | Chilean Pink  |
|         | 8    | 138, 128, 119 |                    | 4             |                    | 169, 122, 101    |                    |                    |                    | 5                  |                  | 213, 185, 174 |               |
|         | 9    | 160, 130, 70  |                    | 5             |                    | 166, 119, 101    |                    | 6                  |                    | 221, 187, 178      |                  | Coffee Foam   |               |
|         | 10   | 164, 137, 70  |                    | 6             |                    | 168, 124, 99     |                    | French Beige       |                    | 7                  |                  | 219, 194, 172 | Coffee Foam   |
|         |      |               |                    |               |                    |                  | 8                  | 207, 171, 159      | Silver Pink        |                    |                  |               |               |

| fig        | item      | RGB code      | ~ color name     | fig          | item          | RGB code         | ~ color name     | fig              | item         | RGB code        | ~ color name  |                    |               |             |
|------------|-----------|---------------|------------------|--------------|---------------|------------------|------------------|------------------|--------------|-----------------|---------------|--------------------|---------------|-------------|
| 12. 8 min  | 1         | 105, 127, 170 | Glaucous         | 13. 6 min    | 7             | 124, 142, 187    | Wild Blue Yonder | 13. 20 min       | 5            | 189, 145, 144   | Rosy Brown    |                    |               |             |
|            | 2         | 206, 197, 185 | Pale Silver      |              | 8             | 111, 129, 174    |                  |                  | 6            | 189, 141, 129   |               |                    |               |             |
|            | 3         | 204, 183, 178 | Silver Pink      |              | 1             | 71, 102, 165     | Queen Blue       |                  | 7            | 194, 158, 125   | Pale Taupe    |                    |               |             |
|            | 4         | 221, 191, 180 | Chilean Pink     |              | 2             | 167, 126, 145    | Mountbatten Pink |                  | 8            | 190, 153, 113   | Camel         |                    |               |             |
|            | 5         | 217, 188, 172 | Coffee Foam      |              | 3             | 126, 144, 187    | Wild Blue Yonder |                  | 1            | 98, 125, 181    | Glaucous      |                    |               |             |
|            | 6         | 226, 194, 180 | Chilean Pink     |              | 4             | 131, 135, 182    |                  |                  | 2            | 215, 194, 173   | Almond        |                    |               |             |
|            | 7         | 220, 198, 175 | Coffee Foam      |              | 5             | 158, 147, 182    | Glossy Grape     |                  | 3            | 226, 213, 161   | Lion          |                    |               |             |
|            | 8         | 218, 183, 161 | Hazelnut         |              | 6             | 152, 137, 180    |                  |                  | 4            | 225, 209, 156   |               |                    |               |             |
| 12. 10 min | 1         | 115, 130, 178 | Wild Blue Yonder | 7            | 151, 140, 174 | 5                |                  | 227, 209, 159    | 14. 6 min    | 6               |               | 227, 207, 157      | Lion          |             |
|            | 2         | 208, 195, 177 | Coffee Foam      | 8            | 144, 133, 167 | 7                |                  | 222, 202, 151    |              |                 |               |                    |               |             |
|            | 3         | 210, 183, 174 | Silver Pink      | 1            | 68, 100, 165  | Medium Sapphire  | 8                | 183, 178, 185    |              | Lavender Gray   |               |                    |               |             |
|            | 4         | 224, 196, 182 | Chilean Pink     | 2            | 178, 136, 138 | Rosy Brown       | 9                | 202, 170, 149    |              | Hazelnut        |               |                    |               |             |
|            | 5         | 216, 189, 172 | Coffee Foam      | 3            | 123, 135, 174 | Wild Blue Yonder | 10               | 216, 197, 145    |              | Lion            |               |                    |               |             |
|            | 6         | 224, 196, 174 |                  | 4            | 141, 138, 181 | Blue Bell        | 11               | 221, 203, 165    |              |                 |               |                    |               |             |
|            | 7         | 223, 200, 168 | Nude             | 5            | 176, 153, 182 | Glossy Grape     | 12               | 221, 199, 158    |              |                 | Lion          |                    |               |             |
|            | 8         | 217, 184, 153 |                  | 6            | 171, 141, 172 |                  | 13               | 226, 203, 160    |              |                 |               |                    |               |             |
| 12. 15 min | 1         | 110, 121, 166 | Rhythm           | 7            | 167, 137, 161 | 8                | 163, 133, 150    | Mountbatten Pink | 14           | 216, 191, 140   | 14. 28 min    | 1                  | 87, 107, 161  | Queen Blue  |
|            | 2         | 208, 191, 157 | Khaki            | 1            | 69, 101, 169  | Medium Sapphire  | 2                | 188, 146, 132    | Pale Taupe   | 2               |               | 208, 195, 159      | Lion          |             |
|            | 3         | 203, 177, 162 | Hazelnut         | 2            | 188, 146, 132 | Pale Taupe       | 3                | 140, 140, 175    | Cool Gray    | 3               |               | 218, 207, 153      |               |             |
|            | 4         | 219, 185, 158 | Nude             | 3            | 140, 140, 175 | Cool Gray        | 4                | 161, 142, 172    | Glossy Grape | 4               |               | 218, 207, 148      |               |             |
|            | 5         | 217, 189, 164 | Coffee Foam      | 4            | 161, 142, 172 | Glossy Grape     | 5                | 179, 151, 169    | Lilac Luster | 5               |               | 220, 206, 145      |               |             |
|            | 6         | 224, 186, 154 | Nude             | 5            | 179, 151, 169 | Lilac Luster     | 6                | 185, 143, 162    | Opera Mauve  | 6               |               | 222, 202, 149      | Lion          |             |
|            | 7         | 217, 191, 137 | Lion             | 6            | 185, 143, 162 | Opera Mauve      | 7                | 179, 138, 140    | Rosy Brown   | 7               |               | 214, 200, 151      |               |             |
|            | 8         | 205, 163, 121 | Camel            | 7            | 179, 138, 140 | 8                | 179, 136, 132    | 1                |              | 64, 96, 162     |               | Medium Sapphire    |               | 8           |
| 12. 29 min | 1         | 105, 117, 154 | Rhythm           | 2            | 189, 150, 120 | Pale Taupe       | 2                | 189, 150, 120    | Pale Taupe   | 9               | 201, 173, 127 | Light French Beige |               |             |
|            | 2         | 198, 185, 153 | Khaki            | 3            | 167, 148, 168 | Rose quartz      | 3                | 167, 148, 168    | Rose quartz  | 10              | 215, 202, 150 | Lion               |               |             |
|            | 3         | 195, 174, 157 | Hazelnut         | 4            | 185, 153, 166 | Lilac Luster     | 4                | 185, 153, 166    | Lilac Luster | 11              | 222, 209, 164 |                    |               |             |
|            | 4         | 212, 185, 148 | Tan              | 5            | 185, 153, 156 | Rosy Brown       | 5                | 185, 153, 156    | Rosy Brown   | 12              | 225, 208, 162 |                    |               |             |
|            | 5         | 211, 182, 152 | Hazelnut         | 6            | 202, 160, 158 | Pastel pink      | 6                | 202, 160, 158    | Pastel pink  | 13              | 221, 205, 154 |                    |               |             |
|            | 6         | 218, 184, 139 | Burlywood        | 7            | 197, 154, 136 | Pale Taupe       | 7                | 197, 154, 136    | Pale Taupe   | 14              | 213, 202, 138 | Lion               |               |             |
|            | 7         | 214, 189, 129 | Sand             | 8            | 186, 149, 120 |                  | 1                | 58, 91, 155      |              | Medium Sapphire | 1             |                    | 93, 118, 182  | Glaucous    |
|            | 13. 5 min | 2             | 153, 133, 165    | Glossy Grape | 2             | 179, 138, 89     | Camel            | 2                | 179, 138, 89 | Camel           | 2             |                    | 209, 186, 170 | Coffee Foam |
| 3          |           | 115, 132, 175 | Wild Blue Yonder | 3            | 171, 143, 158 | Lilac Luster     | 3                | 171, 143, 158    | Lilac Luster | 3               | 220, 205, 186 |                    | Bone          |             |
| 4          |           | 125, 137, 189 |                  | 4            | 196, 157, 158 | Rosy Brown       | 4                | 196, 157, 158    | Rosy Brown   | 4               | 219, 197, 176 | Coffee Foam        |               |             |
| 5          |           | 145, 150, 190 | Blue Bell        | 5            | 171, 143, 158 | Lilac Luster     | 5                | 171, 143, 158    | Lilac Luster | 5               | 215, 186, 171 |                    |               |             |
| 6          |           | 125, 137, 187 | Wild Blue Yonder | 6            | 196, 157, 158 | Rosy Brown       | 6                | 196, 157, 158    | Rosy Brown   | 6               | 218, 189, 171 |                    |               |             |



| fig        | item | RGB code      | ~ color name | fig       | item          | RGB code      | ~ color name  | fig           | item                | RGB code      | ~ color name  |             |
|------------|------|---------------|--------------|-----------|---------------|---------------|---------------|---------------|---------------------|---------------|---------------|-------------|
| 15. 8 min  | 7    | 220, 189, 165 | Coffee Foam  | 16. 7 min | 5             | 225, 206, 164 | Lion          | 17. 10 min    | 3                   | 224, 203, 171 | Lion          |             |
|            | 8    | 178, 170, 183 | Rose quartz  |           | 6             | 222, 204, 156 |               |               | Coffee Foam         | 4             | 217, 197, 170 | Coffee Foam |
|            | 9    | 216, 189, 162 | Coffee Foam  |           | 7             | 223, 201, 164 |               |               | Maximum Blue Purple | 5             | 216, 197, 174 | Tan         |
|            | 10   | 212, 180, 165 | Hazelnut     |           | 8             | 160, 172, 206 | Lilac Luster  |               | 6                   | 211, 185, 148 | Burlywood     |             |
|            | 11   | 208, 180, 168 | Silver Pink  |           | 9             | 182, 156, 169 | Coffee Foam   |               | 7                   | 218, 190, 142 | Dark Gray     |             |
|            | 12   | 209, 180, 174 |              |           | Chilean Pink  | 10            | 203, 182, 161 |               | Tan                 | 8             | 170, 168, 179 | Silver Pink |
|            | 13   | 213, 181, 170 | Silver Pink  |           | 11            | 214, 192, 171 | Coffee Foam   |               | 9                   | 207, 173, 167 | Hazelnut      |             |
|            | 14   | 204, 181, 176 | Glaucous     |           | 12            | 220, 196, 162 | Coffee Foam   |               | 10                  | 214, 182, 156 | Chilean Pink  |             |
| 15. 21 min | 1    | 102, 118, 180 | Dutch White  | 13        | 217, 192, 170 | Han Blue      | 11            | 215, 180, 158 | Queen Blue          |               |               |             |
|            | 2    | 219, 204, 175 | Lion         | 14        | 215, 191, 179 | Lion          | 12            | 217, 177, 165 |                     | Khaki         |               |             |
|            | 3    | 212, 200, 166 | Dutch White  | 1         | 80, 104, 174  | Bone          | 13            | 213, 177, 160 | Lion                |               |               |             |
|            | 4    | 230, 210, 173 | Bone         | 2         | 218, 198, 159 | Lion          | 14            | 211, 181, 170 | Khaki               |               |               |             |
|            | 5    | 219, 205, 179 | Coffee Foam  | 3         | 219, 211, 192 | Lion          | 1             | 75, 101, 157  | Queen Blue          |               |               |             |
|            | 6    | 214, 195, 167 | Lion         | 4         | 221, 209, 159 | Lion          | 2             | 208, 188, 151 | Khaki               |               |               |             |
|            | 7    | 216, 198, 153 | Pale Silver  | 5         | 212, 205, 163 | Lion          | 3             | 208, 190, 151 | Lion                |               |               |             |
|            | 8    | 199, 195, 192 | Tan          | 6         | 219, 209, 160 | Silver        | 4             | 212, 192, 155 | Khaki               |               |               |             |
|            | 9    | 211, 189, 150 | Sand         | 7         | 215, 204, 158 | Queen Pink    | 5             | 209, 190, 157 | Sand                |               |               |             |
|            | 10   | 205, 186, 144 | Lion         | 8         | 189, 193, 196 | Pearl         | 6             | 208, 187, 125 | Dark Gray           |               |               |             |
|            | 11   | 214, 199, 166 | Dutch White  | 9         | 216, 188, 192 | Lion          | 7             | 208, 183, 116 | Hazelnut            |               |               |             |
|            | 12   | 219, 203, 170 | YInMn Blue   | 10        | 220, 212, 189 | Dutch White   | 8             | 169, 170, 174 | Sand                |               |               |             |
|            | 13   | 223, 209, 172 | Silver Pink  | 11        | 228, 222, 196 | Pearl         | 9             | 208, 168, 141 | Light French Beige  |               |               |             |
|            | 14   | 221, 209, 177 | Lion         | 12        | 223, 212, 166 | Lion          | 10            | 203, 181, 132 | Tan                 |               |               |             |
| 16. 7 min  | 1    | 75, 104, 173  | Lion         | 13        | 227, 213, 184 | Coffee Foam   | 11            | 209, 182, 130 | Light French Beige  |               |               |             |
|            | 2    | 200, 175, 170 | 17           | 1         | 77, 102, 167  | Queen Blue    | 12            | 209, 180, 136 | Tan                 |               |               |             |
|            | 3    | 214, 195, 162 | 1            | 2         | 215, 198, 169 | Coffee Foam   | 13            | 214, 188, 134 | Light French Beige  |               |               |             |
|            | 4    | 225, 204, 157 | 2            |           |               |               | 14            | 213, 197, 163 | Lion                |               |               |             |
